# Supplementary material for: Structural frustration, metastability and cascade of polar phases in a layered lead bromide perovskite
Source: Royal Society of Chemistry journal article supplement (doi:10.1039/d5sc09693f), 2026-06-09
Supplement: d5sc09693f1.pdf [file d5sc09693f1.pdf]

Supporting information for

**Structural frustration, metastability and cascade of polar phases in a layered lead bromide  
perovskite**

Mirosław Mączka,<sup>\*,a</sup> Katarzyna Fedoruk-Piskorska,<sup>\*,b,c</sup> Anna Gągor,<sup>a</sup> Jan K. Zaręba,<sup>d</sup> Dagmara  
Stefańska,<sup>a</sup> Maciej Ptak,<sup>a</sup> Dawid Drozdowski,<sup>a</sup> and Adam Sieradzki<sup>b</sup>

<sup>a</sup>*Institute of Low Temperature and Structure Research, Polish Academy of Sciences, 50-422  
Wrocław, Poland*

<sup>b</sup>*Institute of Physics, University of Silesia, Uniwersytecka 4, 40-007 Katowice, Poland*

<sup>c</sup>*Department of Experimental Physics, Wrocław University of Science and Technology, Wrocław,  
Poland*

<sup>d</sup>*Institute of Advanced Materials, Faculty of Chemistry, Wrocław University of Science and  
Technology, 50-370 Wrocław, Poland*

e-mail: m.maczka@intibs.pl; katarzyna.fedoruk-piskorska@pwr.edu.pl

**Table S1.** Selected hydrogen-bond parameters of CPA<sub>2</sub>PbBr<sub>4</sub>.

| <i>D</i> —H··· <i>A</i>      | <i>D</i> —H (Å) | H··· <i>A</i> (Å) | <i>D</i> ··· <i>A</i> (Å) | <i>D</i> —H··· <i>A</i> (°) |
|------------------------------|-----------------|-------------------|---------------------------|-----------------------------|
| <b>II, 350 K</b>             |                 |                   |                           |                             |
| N5—H5A···Br1 <sup>i</sup>    | 0.89            | 2.56              | 3.430 (17)                | 164.7                       |
| N5—H5B···Br1 <sup>ii</sup>   | 0.89            | 2.56              | 3.382 (17)                | 153.2                       |
| N5—H5C···Br2 <sup>ii</sup>   | 0.89            | 2.77              | 3.526 (17)                | 144.1                       |
| <b>III, 295 K</b>            |                 |                   |                           |                             |
| N1—H1A···Br3                 | 0.89            | 2.59              | 3.366 (14)                | 146.0                       |
| N1—H1B···Br3 <sup>iv</sup>   | 0.89            | 2.54              | 3.361 (15)                | 153.2                       |
| N1—H1C···Br1                 | 0.89            | 2.74              | 3.498 (17)                | 143.7                       |
| <b>IV, 100 K</b>             |                 |                   |                           |                             |
| N9—H9A···Br8 <sup>v</sup>    | 0.91            | 2.48              | 3.385 (11)                | 177.4                       |
| N9—H9B···Br5 <sup>v</sup>    | 0.91            | 2.84              | 3.413 (12)                | 122.3                       |
| N9—H9B···Br1                 | 0.91            | 2.69              | 3.429 (12)                | 138.9                       |
| N9—H9C···Br4                 | 0.91            | 2.44              | 3.341 (12)                | 169.5                       |
| N5—H5A···Br3                 | 0.91            | 2.48              | 3.390 (10)                | 174.5                       |
| N5—H5B···Br2                 | 0.91            | 2.77              | 3.407 (12)                | 127.6                       |
| N5—H5B···Br6                 | 0.91            | 2.76              | 3.446 (12)                | 133.2                       |
| N5—H5C···Br7                 | 0.91            | 2.44              | 3.348 (12)                | 174.6                       |
| N13—H13A···Br2               | 0.91            | 2.82              | 3.489 (13)                | 131.6                       |
| N13—H13A···Br6               | 0.91            | 2.82              | 3.469 (12)                | 129.2                       |
| N13—H13B···Br4               | 0.91            | 2.45              | 3.329 (11)                | 162.9                       |
| N13—H13C···Br8               | 0.91            | 2.50              | 3.407 (13)                | 171.1                       |
| N1—H1A···Br5 <sup>v</sup>    | 0.91            | 2.76              | 3.474 (13)                | 136.6                       |
| N1—H1A···Br1                 | 0.91            | 2.88              | 3.496 (12)                | 126.0                       |
| N1—H1B···Br7 <sup>v</sup>    | 0.91            | 2.45              | 3.325 (11)                | 161.8                       |
| N1—H1C···Br3                 | 0.91            | 2.49              | 3.388 (13)                | 170.1                       |
| <b>V, 100 K</b>              |                 |                   |                           |                             |
| N1—H1A···Br4 <sup>vi</sup>   | 0.91            | 2.64              | 3.33 (6)                  | 132.8                       |
| N1—H1B···Br3 <sup>vii</sup>  | 0.91            | 2.53              | 3.30 (4)                  | 142.6                       |
| N1—H1C···Br1                 | 0.91            | 2.85              | 3.48 (6)                  | 127.7                       |
| N5—H5A···Br4                 | 0.91            | 2.57              | 3.39 (5)                  | 150.0                       |
| N5—H5B···Br3 <sup>viii</sup> | 0.91            | 2.42              | 3.33 (7)                  | 175.9                       |
| N5—H5C···Br2 <sup>vi</sup>   | 0.91            | 2.56              | 3.45 (6)                  | 167.6                       |

Symmetry code(s): (i)  $-x+1/2, -y+1, z-1/2$ ; (ii)  $-x+1/2, y+1/2, z$ ; (iii)  $x-1/2, -y+1/2, -z+1$ ; (iv)  $x, -y+1, z+1/2$ ; (v)  $x, y, z-1$ ; (vi)  $-x+1, y+1/2, -z+1$ ; (vii)  $x, y, z+1$ ; (viii)  $-x+1, y-1/2, -z+1$ .

**Table S2.** Comparison of structural and optical parameters for various phases of CPA<sub>2</sub>PbBr<sub>4</sub>.

| phase                                | Pb-Br-Pb<br>angle ( $\theta_{\text{tilt}}$ , °) | D <sub>in</sub> /D <sub>out</sub> | $\Delta d$<br>·10 <sup>-3</sup> | $\sigma^2$ (°) | Exciton<br>nm (eV) | E <sub>g</sub><br>(eV) | PL<br>nm (eV)              |
|--------------------------------------|-------------------------------------------------|-----------------------------------|---------------------------------|----------------|--------------------|------------------------|----------------------------|
| I, <i>Cmca</i> (370 K)               | 153.7                                           | 26.3/0                            | 5.1                             | 0              |                    |                        |                            |
| II, <i>Pbca</i> (350 K)              | 153.7                                           | 26.1/3.1                          | 3.3                             | 6              |                    |                        |                            |
| III, <i>Cmc2<sub>1</sub></i> (295 K) | 158.8                                           | 24.2/0                            | 9.8                             | 18             |                    |                        | 401.4 (3.09)               |
|                                      | 145.5                                           | 34.5/0                            |                                 |                | 401(3.09)          | 3.15                   | 426.6 (2.91)<br>488 (2.54) |
| IV, <i>Pna2<sub>1</sub></i> (100 K)  | 157.1                                           | 22.8/2.0                          | 16.2                            | 34             |                    |                        | 386.1 (3.21)               |
|                                      | 157.0                                           | 22.9/2.4                          | 11.9                            | 32             |                    |                        | 389.9 (3.18)               |
|                                      | 138.2                                           | 40.6/9.6                          |                                 |                |                    |                        | 397.6 (3,12)               |
|                                      | 138.3                                           | 41.4/6.4                          |                                 |                |                    |                        | 583 (2.13)                 |
| V, <i>P2<sub>1</sub></i> (100 K)     | 144.7                                           | 29.6/20.2                         | 6.9                             | 15             |                    |                        | 388.9 (3.19)               |
|                                      | 146.9                                           | 26.8/18.2                         |                                 |                |                    |                        | 398.0 (3.12)               |
|                                      |                                                 |                                   |                                 |                |                    |                        | 592 (2.09)                 |

**Table S3.** Raman wavenumbers (in  $\text{cm}^{-1}$ ) of  $\text{CPA}_2\text{PbBr}_4$  in the heating run at 80, 190, 250, 350 and 370 K together with the proposed assignment.<sup>a</sup> For the comparison sake, Raman wavenumbers obtained in the cooling run at 80 K are present in the last column on the right.

| 370 K<br>( <i>Cmce</i><br>phase) | 350 K<br>( <i>Pbca</i><br>phase) | 250 K<br>( <i>Cmc2<sub>1</sub></i> phase) | 190 K<br>( <i>P2<sub>1</sub></i> phase) | 80 K<br>( <i>Pna2<sub>1</sub></i> phase) | 80 K<br>( <i>P2<sub>1</sub></i> phase) | assignment                        |
|----------------------------------|----------------------------------|-------------------------------------------|-----------------------------------------|------------------------------------------|----------------------------------------|-----------------------------------|
| 3178w,b                          | 3181w,b                          | 3189m                                     | 3189vw+3182vw                           | 3194m+3184w                              | 3184vw                                 | $\nu_{\text{as}}(\text{NH}_3^+)$  |
|                                  |                                  |                                           | 3154w                                   | 3161vw+3153w                             | 3154w                                  |                                   |
|                                  |                                  | 3131w                                     | 3120m                                   | 3135w+3130w                              | 3120m                                  | $\nu_{\text{as}}(\text{NH}_3^+)$  |
|                                  |                                  |                                           |                                         | 3069vw+3054vw                            |                                        | overtones                         |
| 3062vb,m                         | 3053vb,s                         | 3036s                                     | 3079m+3057sh                            | 3041sh+3030vs                            | 3077s                                  | $\nu_{\text{s}}(\text{NH}_3^+)$   |
| 3007sh                           | 3007w                            | 3008m                                     | 3013s                                   | 3006m+3003sh                             | 3013s                                  | $\nu_{\text{as}}(\text{CH}_2)$    |
| 2996m                            | 2994m                            | 2995m                                     | 2996vw                                  | 2995s                                    | 2996w                                  | $\nu_{\text{as}}(\text{CH}_2)$    |
| 2966s                            | 2966s                            | 2967s                                     | 2966sh+2964s                            | 2978m+2961m                              | 2967m+2964m                            | $\nu_{\text{s}}(\text{CH}_2)$     |
| 2943s                            | 2942s                            | 2945s                                     | 2944m                                   | 2947m+2938s                              | 2944m                                  | $\nu_{\text{s}}(\text{CH}_2)$     |
| 2920s                            | 2920s                            | 2928m                                     | 2918s                                   | 2929sh                                   | 2918m                                  | $\nu_{\text{s}}(\text{CH}_2)$     |
| 2911sh                           | 2910sh                           | 2911s                                     | 2910s                                   | 2915m+2902m                              | 2910s                                  | $\nu_{\text{s}}(\text{CH}_2)$     |
| 2876w                            | 2876w                            | 2877w                                     | 2879w+2876w                             | 2886sh+2878w                             | 2880w                                  | overtone                          |
| 1588m                            | 1585m                            | 1594w                                     |                                         | 1600w+1594w                              |                                        | $\delta_{\text{as}}(\text{NH}_3)$ |
| 1575m                            | 1570w                            | 1577w+1569w                               | 1578s                                   | 1578w+1568w                              | 1579s                                  | $\delta_{\text{as}}(\text{NH}_3)$ |
| 1484m                            | 1488s                            | 1493s                                     | 1473sh+1470s                            | 1493s+1487w                              | 1473sh+1471s                           | $\delta_{\text{s}}(\text{NH}_3)$  |
| 1442w                            | 1449w                            | 1452w                                     |                                         | 1463w+1460w                              |                                        | $\delta(\text{CH}_2)$             |
|                                  |                                  | 1446vw                                    | 1451w                                   | 1453vw+1449vw                            | 1452w                                  | $\delta(\text{CH}_2)$             |
| 1427vw                           | 1431vw                           | 1429w                                     | 1439w+1428w                             | 1433w+1423w                              | 1440w+1429m                            | $\delta(\text{CH}_2)$             |
| 1395vw                           | 1398w                            | 1398w                                     | 1398w                                   | 1402sh+1399w                             | 1398w                                  | $\omega(\text{CH}_2)$             |
|                                  | 1337w                            | 1337w                                     | 1337m                                   | 1336vw                                   | 1337m                                  | $\omega(\text{CH}_2)$             |
| 1323w                            | 1324m                            | 1325s                                     | 1329m                                   | 1329s                                    | 1329m                                  | $\omega(\text{CH}_2)$             |
|                                  | 1302w                            | 1302w                                     | 1311w+1303m                             | 1303w                                    | 1315w+1303m                            | $\omega(\text{CH}_2)$             |
|                                  | 1262w                            | 1263w                                     | 1269m                                   | 1263vw                                   | 1270s                                  | $\tau(\text{CH}_2)$               |
| 1214vw                           | 1215w                            | 1217m                                     | 1222s                                   | 1218m                                    | 1223s                                  | $\tau(\text{CH}_2)$               |
|                                  |                                  | 1134w                                     |                                         | 1137m                                    |                                        | $\rho(\text{NH}_3^+)$             |
| 1120vw                           | 1122w                            | 1124m                                     | 1127s                                   | 1127m                                    | 1128s                                  | $\rho(\text{CH}_2)$               |

|           |           |           |              |                 |            |                                |
|-----------|-----------|-----------|--------------|-----------------|------------|--------------------------------|
|           | 1094vw    | 1096w     | 1101w        | 1100vw+1095vw   | 1102w      | $\rho(\text{CH}_2)$            |
|           | 1050w     | 1051m     |              | 1052m           |            | $\nu(\text{CN})$               |
| 1041vw    | 1040w     | 1040w     | 1043m        | 1039w           | 1044m      | $\rho(\text{CH}_2)$            |
| 998vw     | 998w      | 1001w     | 1001w        | 1008w           | 1002w      | $\nu_{\text{as}}(\text{CCC})$  |
|           | 989w      | 991w      |              | 995vw           |            | $\rho(\text{CH}_2)$            |
| 961vw     | 966w      | 969w      | 973m         | 973w            | 973m       | $\omega(\text{NH}, \text{CH})$ |
| 934vw     | 936s      | 938s      | 939vw+929m   | 940s+930w       | 939vw+930m | $\nu_{\text{s}}(\text{CCC})$   |
| 834vw     | 836w      | 839w      | 841m         | 843sh+840w      | 842m       | $\rho(\text{CH}_2)$            |
| 777w      | 777w      | 779w+772w | 779m         | 768w            | 780s       | $\rho(\text{CH}_2)$            |
| 738vw     | 739w      | 740w      | 741vw        | 741w            |            | $\nu(\text{CCl})$              |
| 659m      | 660m      | 660m      | 656s         | 660w            | 657s       | $\nu(\text{CCl})$              |
| 483vw     | 483m      | 484m      | 485s         | 487m            | 486s       | $\delta(\text{CCN})$           |
|           | 424w      | 425w      |              | 425w            |            | $\delta(\text{CCC})$           |
|           | 333vw     | 335w      | 337w         | 330w+326sh      | 339m       | $\delta(\text{CCCl})$          |
| 294m,b    | 290m,b    | 288w,b    | 307s         | 286w,b          | 307s       | $\tau(\text{NH}_3^+)$          |
|           |           | 266w      | 270w         |                 | 271w       | $\tau(\text{CH}_3)$            |
|           |           | 188sh     | 171m         | 191m            | 175m       | L+ T'+ Pb-Br stretch           |
| 145sh     | 146sh     | 143m      | 152m         | 156m            | 158m       | L+ T'+ Pb-Br stretch           |
| 116m      | 116m      | 118s      | 117m+109w    | 121vs+113w      | 123m       | L+ T'+ Pb-Br stretch           |
|           |           | 88sh      |              | 94s+92s         |            | Pb-Br bend                     |
| 72vs      | 76vs      | 82vs      | 82vs+71m     | 86s+78s+73m+71m | 84vs+73s   | Pb-Br bend                     |
| 56vs      | 58vs      | 60vs+54sh | 66m+64sh+55m | 62vs+52vs       | 68w+57s    | Pb-Br bend                     |
| 35vs+22sh | 33vs+22sh | 39vs+30sh | 40sh+36vs    | 41vs+33s+21s    | 42vs+37vs  | L(PbBr <sub>6</sub> )          |

<sup>a</sup> key: vs, very strong; s, strong; m, medium; w, weak; vw, very weak; sh, shoulder;  $\nu$ , stretching;  $\delta$ , bending (scissoring);  $\rho$ , rocking;  $\omega$ , wagging;  $\tau$ , twist; L, librational mode of organic cation; T', translational mode of organic cation.

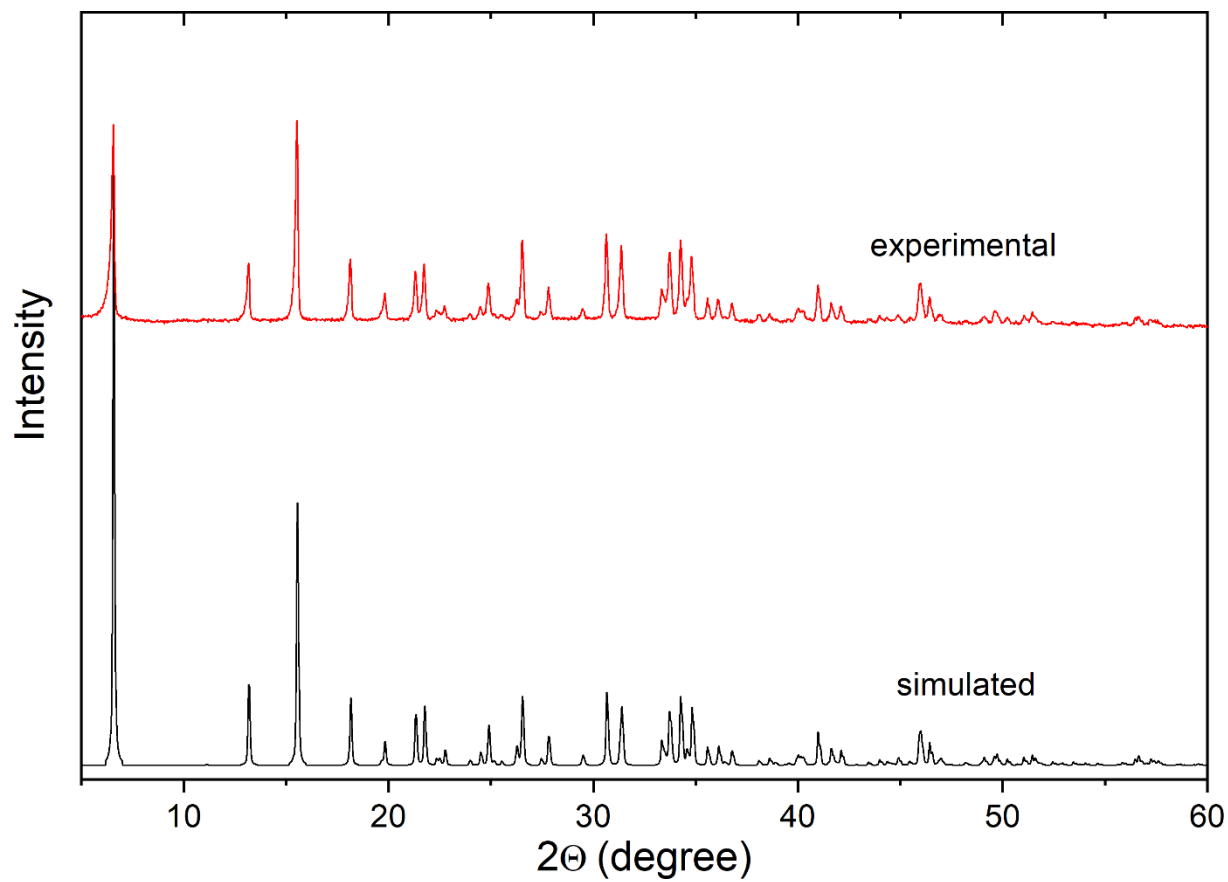

Figure S1. Experimental and calculated PXRD patterns of pristine CPA<sub>2</sub>PbBr<sub>4</sub>.

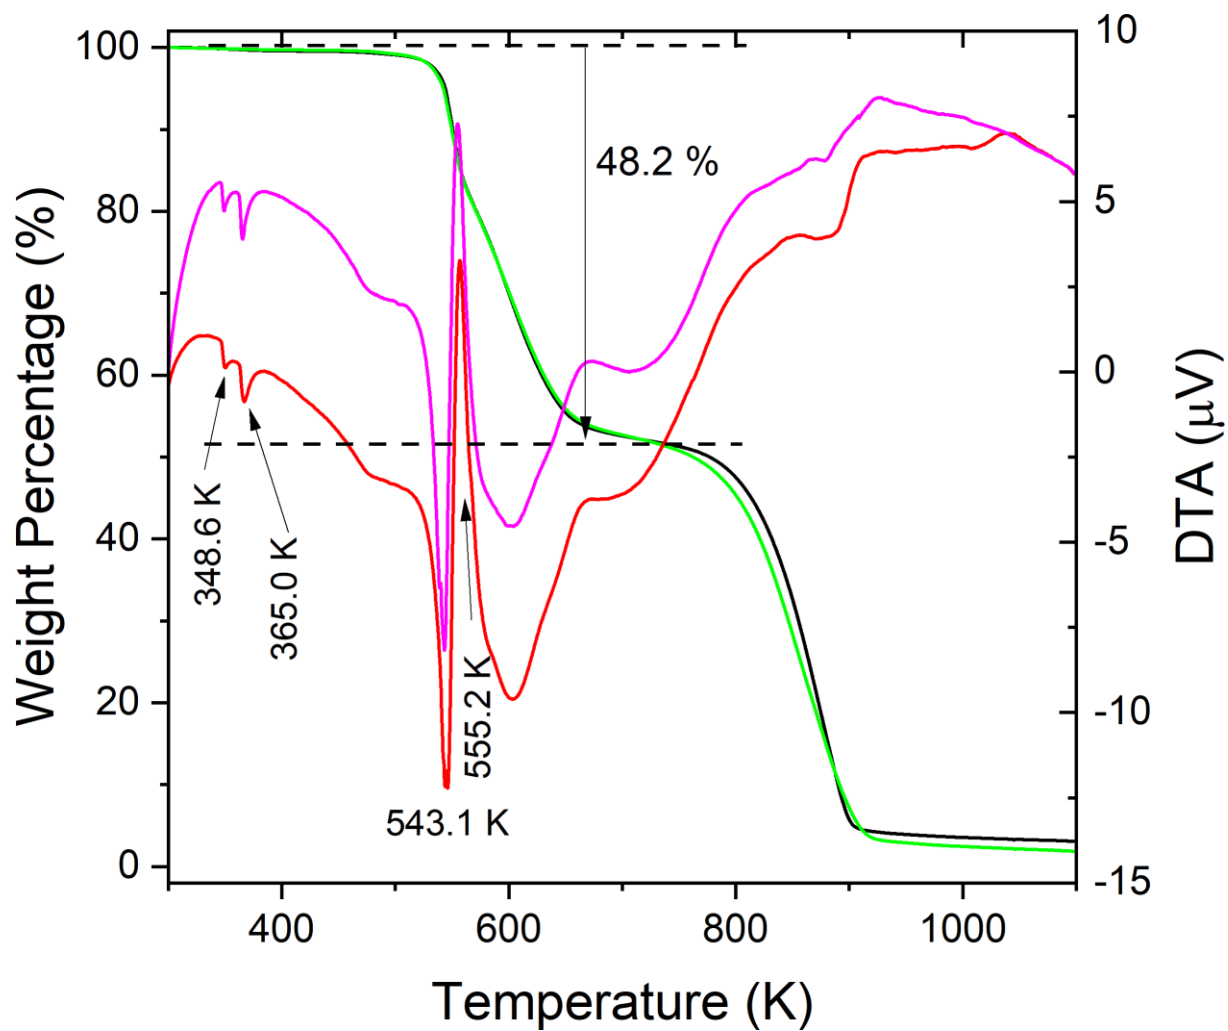

Figure S2. TG (solid black line) and DTA (red line) plots of pristine  $\text{CPA}_2\text{PbBr}_4$ . Green and magenta lines correspond to TG and DTA of  $\text{CPA}_2\text{PbBr}_4$  annealed at 380 K for 10 minutes.

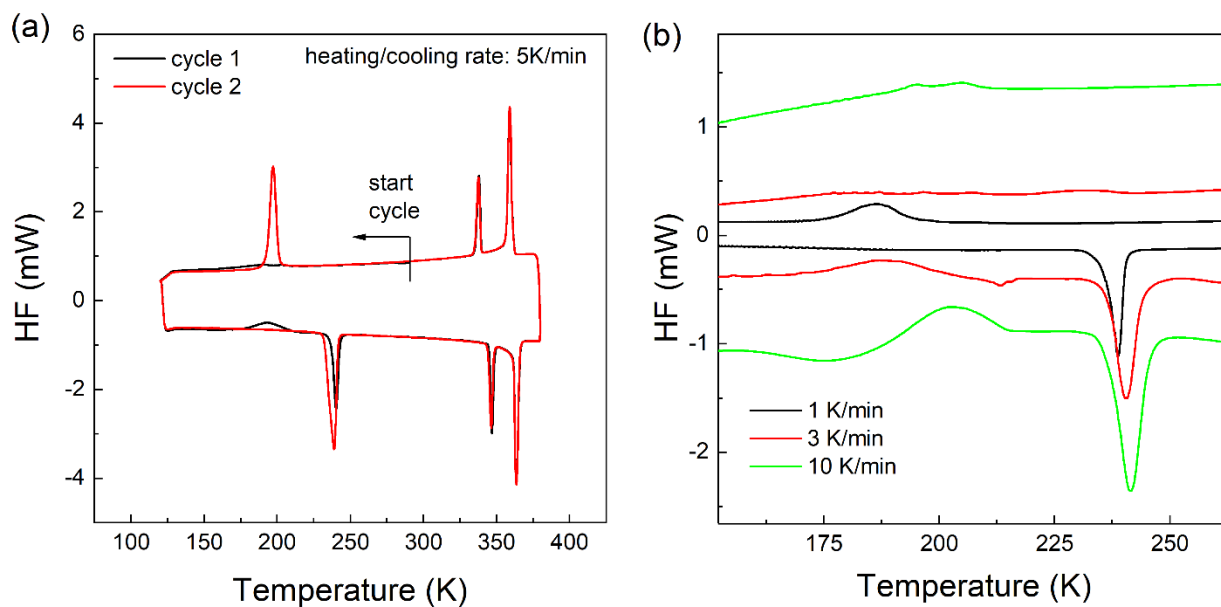

Figure S3. (a) DSC traces of CPA<sub>2</sub>PbBr<sub>4</sub> measured at 5 K/min rate (first loop, black line: 288K→120 K→380 K→300 K; second loop, red line: 300 K→120 K→380 K→300 K). (b) DSC curves of CPA<sub>2</sub>PbBr<sub>4</sub> recorded during the first thermal cycle at different heating/cooling rates (1, 3, and 10 K/min).

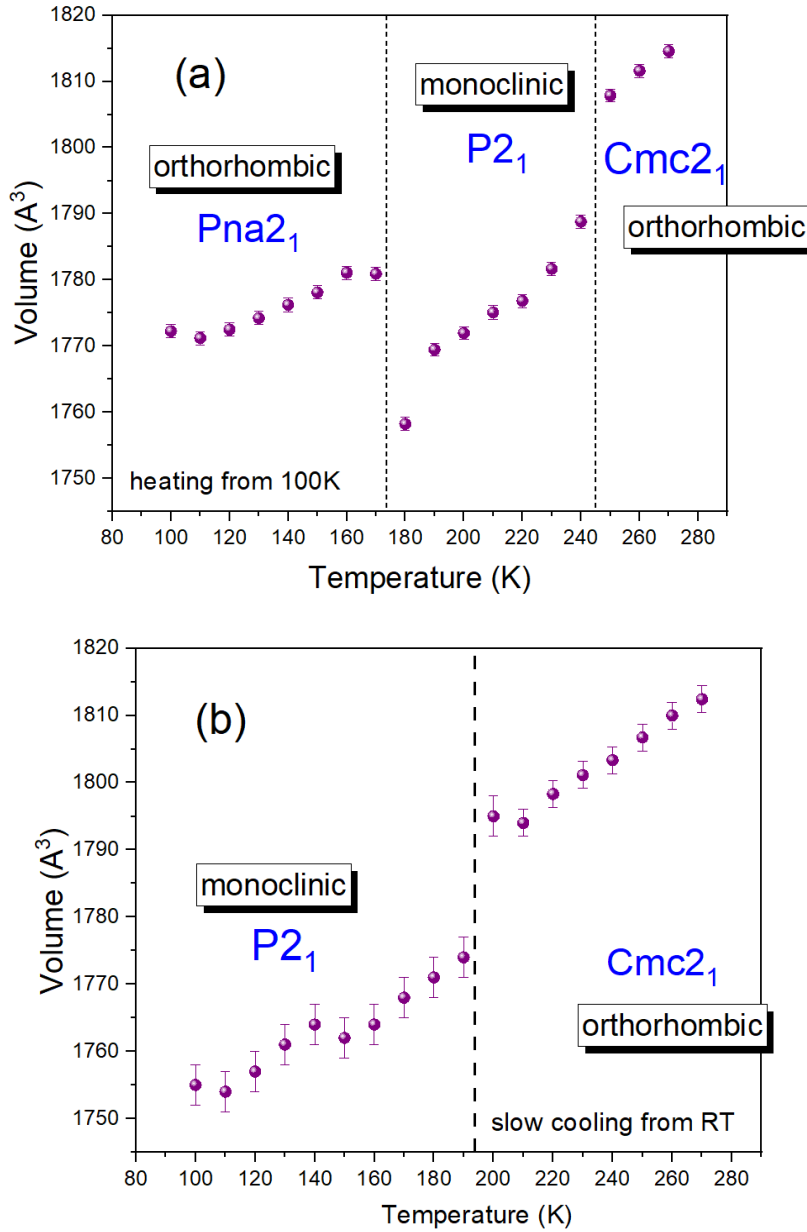

Figure S4. The unit cell volume changes with temperature. (a) pristine sample quenched to 100 K at rate  $\sim 5$  K/min and then gradually heated (2.5 K/min between the temperature points and 30 min. stabilization at each point for data collection); (b) pristine sample gradually cooled from RT down to 100 K (2.5 K/min between the temperature points and 30 min. stabilization at each point).

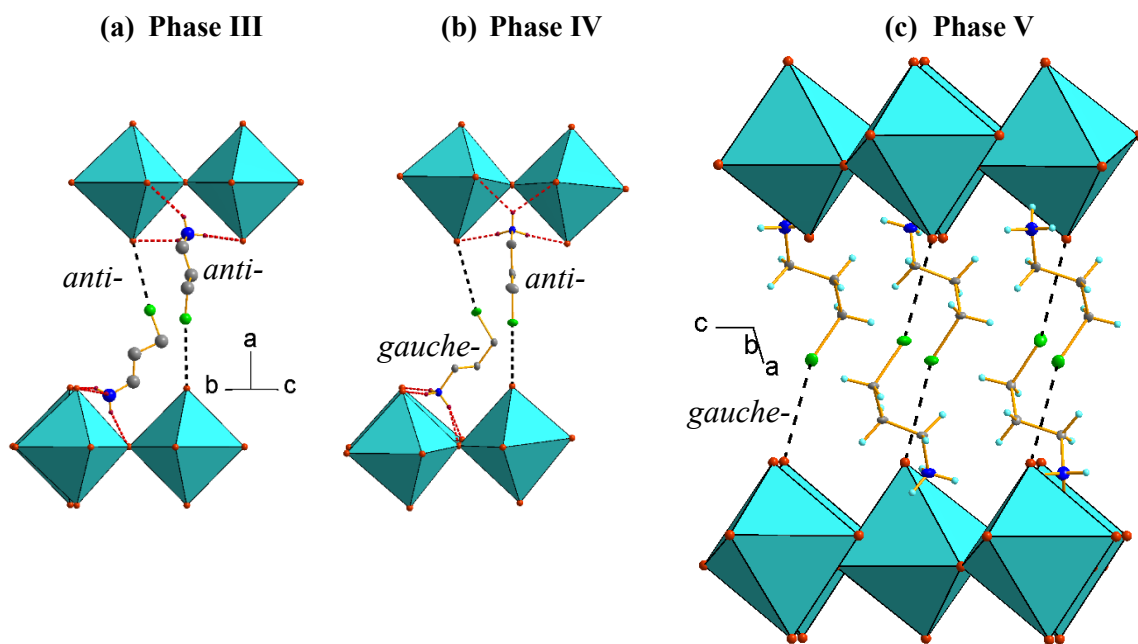

Figure S5. The *anti* and *gauche* conformations of CPA<sup>+</sup> in III (a) and IV phase (b); the view along polar direction in monoclinic phase V (c). All CPA<sup>+</sup> in V adopt *gauche* conformation; dashed black lines stand for halogen-halogen interactions, red for HBs.



## Supplementary discussion – Raman spectroscopy

Detailed inspection of the metastable phase **IV** spectra reveals specific splitting patterns associated with cation conformation. Since phase **IV** contains two independent CPA<sup>+</sup> cations in *anti* conformation and two in *gauche* conformation, internal modes should theoretically split into four components (two doublets). However, Figure S6 and Table S3 show that most modes exhibit splitting into only two resolvable components. This suggests that the two *anti* conformers possess sufficiently similar structural environments that their vibrational energies are nearly degenerate and cannot be resolved given the significant thermal broadening. A similar degeneracy likely applies to the *gauche* conformers.

The structural relationship between the HT phase **III** and the LT metastable phase **IV** is further illuminated by specific spectral markers (Figure S7). Beyond the broadness of the  $\tau(\text{NH}_3)$  band, the similarity in the  $\nu_s(\text{NH}_3)$  mode positions, i.e.  $3033\text{ cm}^{-1}$  in phase **IV** (170 K) versus  $3036\text{ cm}^{-1}$  in phase **III** (250 K) corroborates X-ray evidence that the cationic sub-lattice adopts a similar averaged orientation in both phases. However, the disorder in phase **III** is quantitatively higher, as evidenced by the larger FWHM of the  $\tau(\text{NH}_3)$  band ( $71.8\text{ cm}^{-1}$  vs  $58.1\text{ cm}^{-1}$ ) and the disappearance of mode splitting observed in phase **IV**. The reduction in the number of Raman bands in phase **III** aligns with the crystallographic reduction in independent cation and halide sites.

Furthermore, closer monitoring of the lattice region during the **IV**  $\rightarrow$  **V** transition (Figure S6) reveals that residual bands characteristic of phase **IV** persist up to 180 K before disappearing completely at 190 K. This co-existence interval highlights the kinetic barrier associated with the reorganization of the octahedral framework. In the high-temperature regime, the transition from phase **II** to **I** is spectrally subtle; while the internal modes remain static, the continuous increase in bandwidths across the entire spectral range confirms that the **II**  $\rightarrow$  **I** transition is driven by dynamic orientational disordering rather than displacive structural modification.

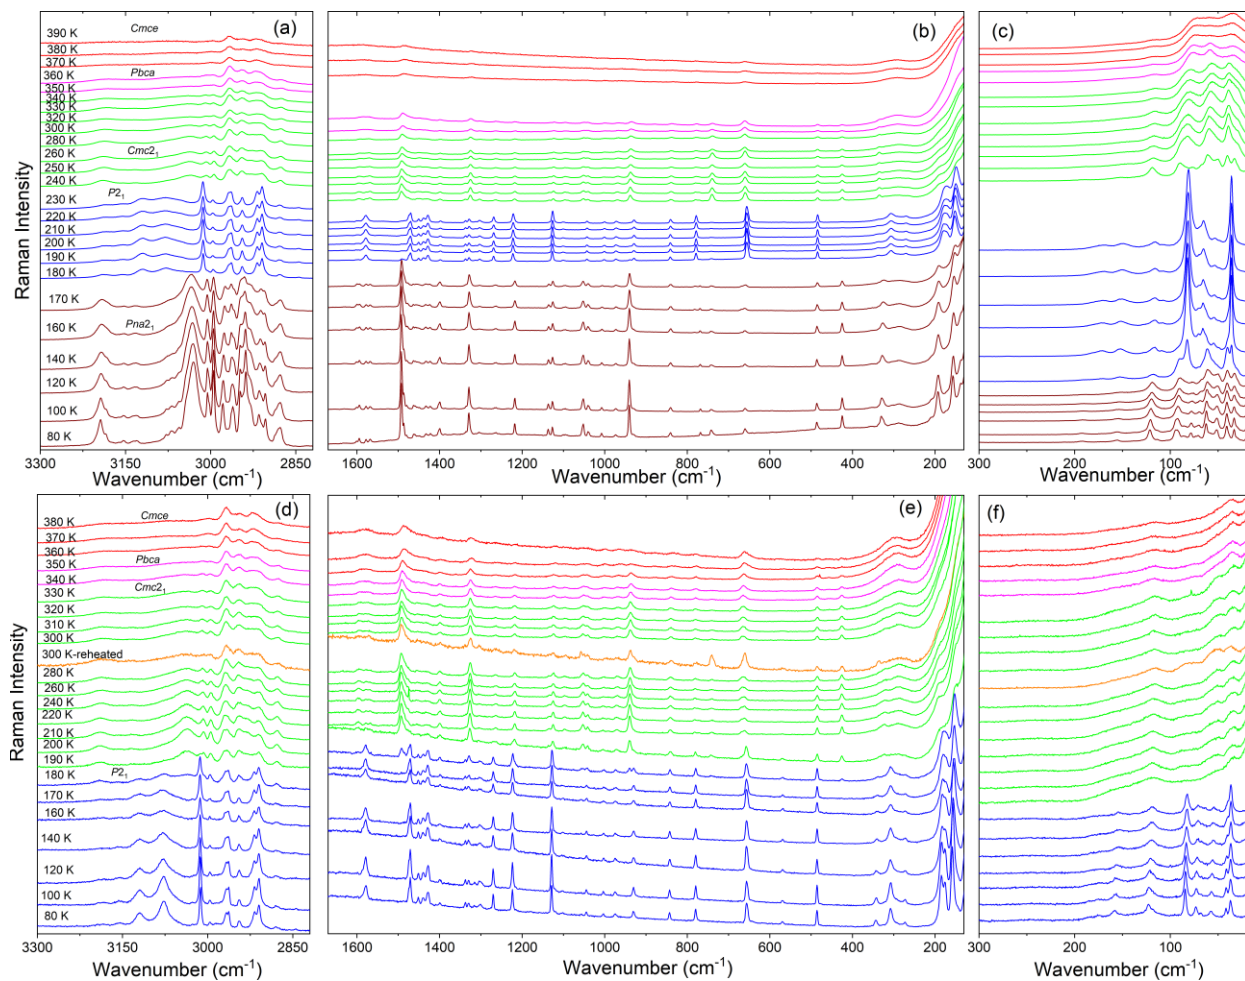

Figure S6. Raman spectra of CPA<sub>2</sub>PbBr<sub>4</sub> during heating (a,b,c) and cooling (d,e,f) runs in the (a,d) 3300-2820 cm<sup>-1</sup>, (b,e) 1670-130 cm<sup>-1</sup> and (c,f) 300-15 cm<sup>-1</sup> range.

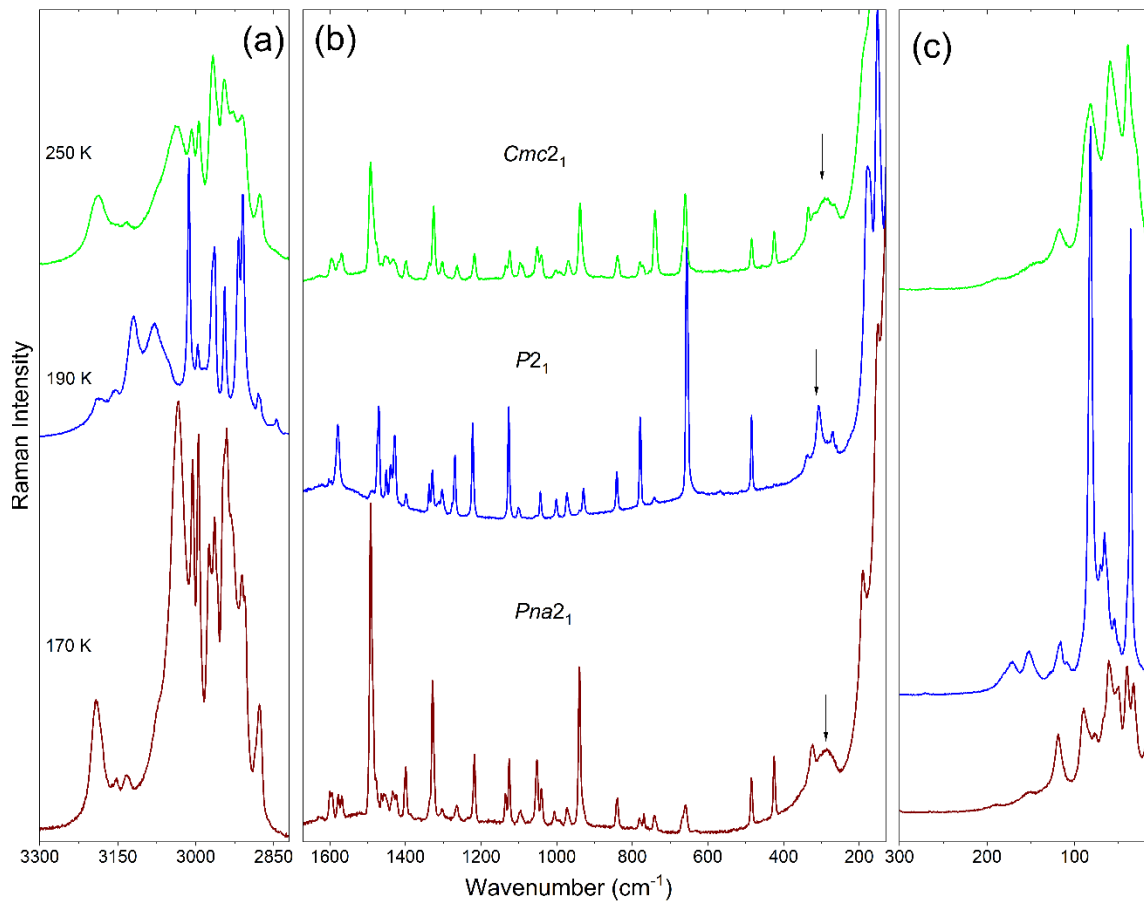

Figure S7. Raman spectra of CPA<sub>2</sub>PbBr<sub>4</sub> recorded at 170, 190 and 250 K during heating run in the (a) 3300-2820 cm<sup>-1</sup>, (b) 1670-130 cm<sup>-1</sup> and (c) 300-15 cm<sup>-1</sup> range. Arrows indicate the  $\tau(\text{NH}_3^+)$  band, which exhibits pronounced narrowing in the  $P2_1$  phase.

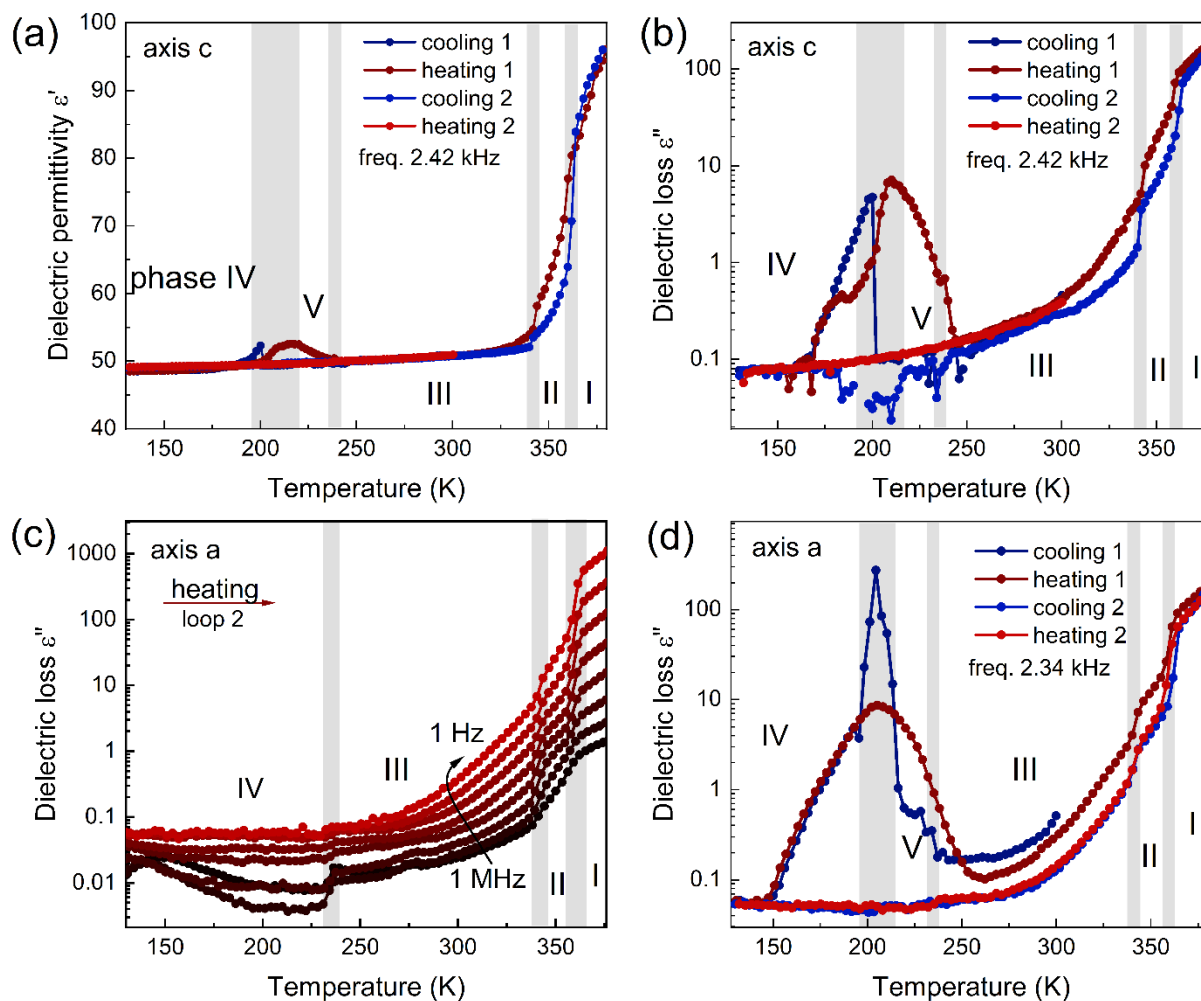

Figure S8. Temperature dependence of dielectric properties of single crystals measured along the crystallographic axes. (a) Real part of dielectric permittivity ( $\epsilon'$ ) and (b) dielectric loss ( $\epsilon''$ ) measured along the c-axis at  $\sim 2.42$  kHz. (c) Dielectric loss ( $\epsilon''$ ) along the a-axis at different frequencies. (d) Dielectric loss ( $\epsilon''$ ) along the a-axis at  $\sim 2.34$  kHz.

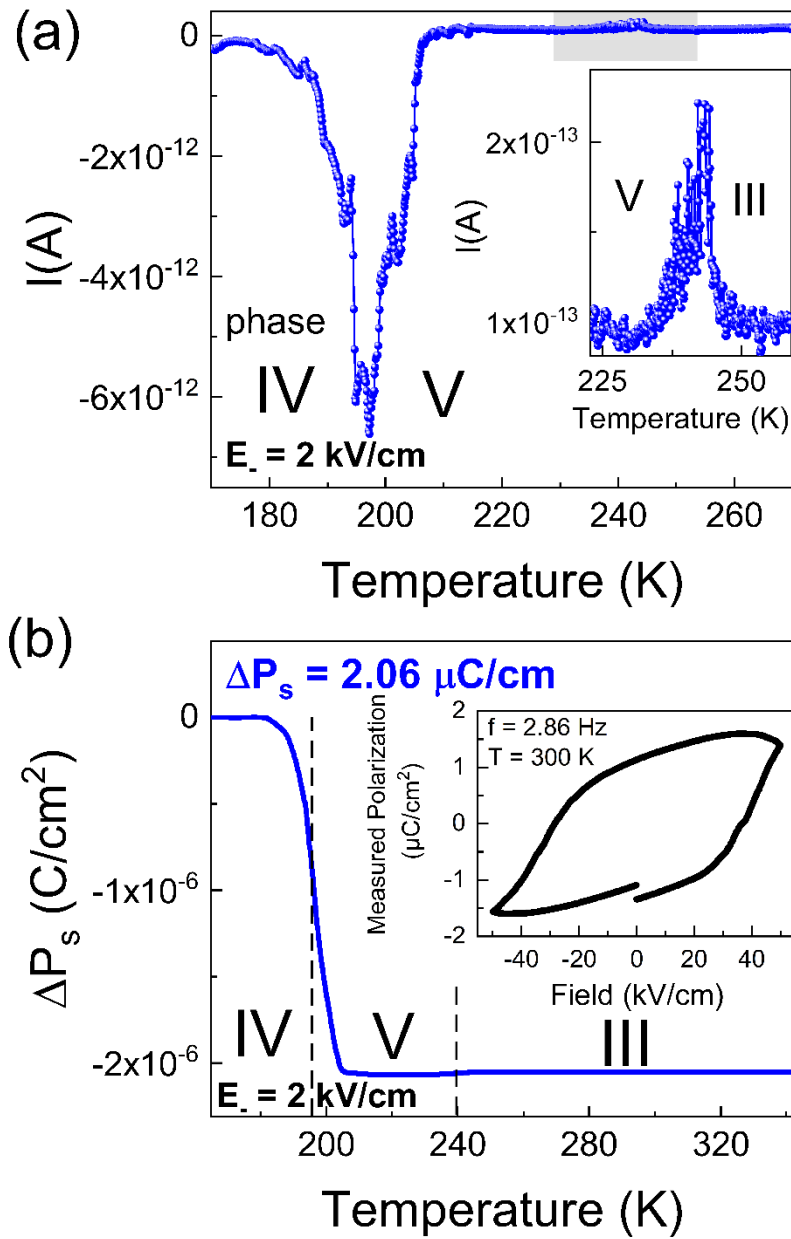

Figure S9. (a) Changes of the pyroelectric current of a single crystal in the direction of the polar axis after negative poling in a DC electric field. (b) Relative change of spontaneous polarization as a function of temperature determined by the integration of the pyroelectric current. Inset P-E hysteresis loop measured at 300 K.

## Supplementary discussion – linear optical properties:

The optical properties of CPA<sub>2</sub>PbBr<sub>4</sub> present interesting contrasts when compared to its structural analogues. While the excitonic absorption position (401 nm) is nearly identical to that of BA<sub>2</sub>PbBr<sub>4</sub> (BA= butylammonium, excitonic peak at 404 nm)<sup>1</sup> and BZA<sub>2</sub>PbBr<sub>4</sub> (BZA=benzylammonium, excitonic peak at 400 nm)<sup>2</sup>, the behavior of the self-trapped exciton (STE) emission reveals the subtle influence of the halide substitution in the organic cation. For the chloride analogue, CPA<sub>2</sub>PbCl<sub>4</sub>, the STE emission at 80 K is centered at 598 nm, resulting in a significantly larger Stokes shift of ~280 nm compared to the ~195 nm observed for CPA<sub>2</sub>PbBr<sub>4</sub>. Since both compounds exhibit comparable magnitudes of octahedral tilting (out-of-plane tilt  $D_{\text{out}}=8.2^\circ$  for the chloride<sup>3</sup> vs  $9.6^\circ$  for phase **IV** of the bromide), the variation in Stokes shift cannot be attributed solely to structural distortion. Instead, it points to differences in electron-phonon coupling strength,<sup>1,4</sup> likely governed by the distinct phonon energies of the inorganic lattice upon substituting Cl with Br.

Detailed analysis of the PL quenching dynamics provides further insight into the trap states. While the main text discusses heating parameters, the cooling run yields slightly different activation energies due to the hysteresis of the PTs. In the HT phase **III**, the quenching of the Near-Bandgap Emission (NBE) during cooling yields an activation energy  $E_a$  of 225 meV (Figure S15), comparable to the heating value. However, the STE quenching in phase **III** during cooling shows an  $E_a$  of 173 meV. Notably, in the LT regime of phase **V** (below 190 K upon cooling), the STE quenching activation energy remains low at approximately 51 meV (Figure S16). This value is nearly identical to that observed in the metastable phase **IV** during heating, suggesting that despite their structural differences, the depth of the self-trapping potential or the phonon modes coupling to the exciton are similar in both low-temperature polymorphs.

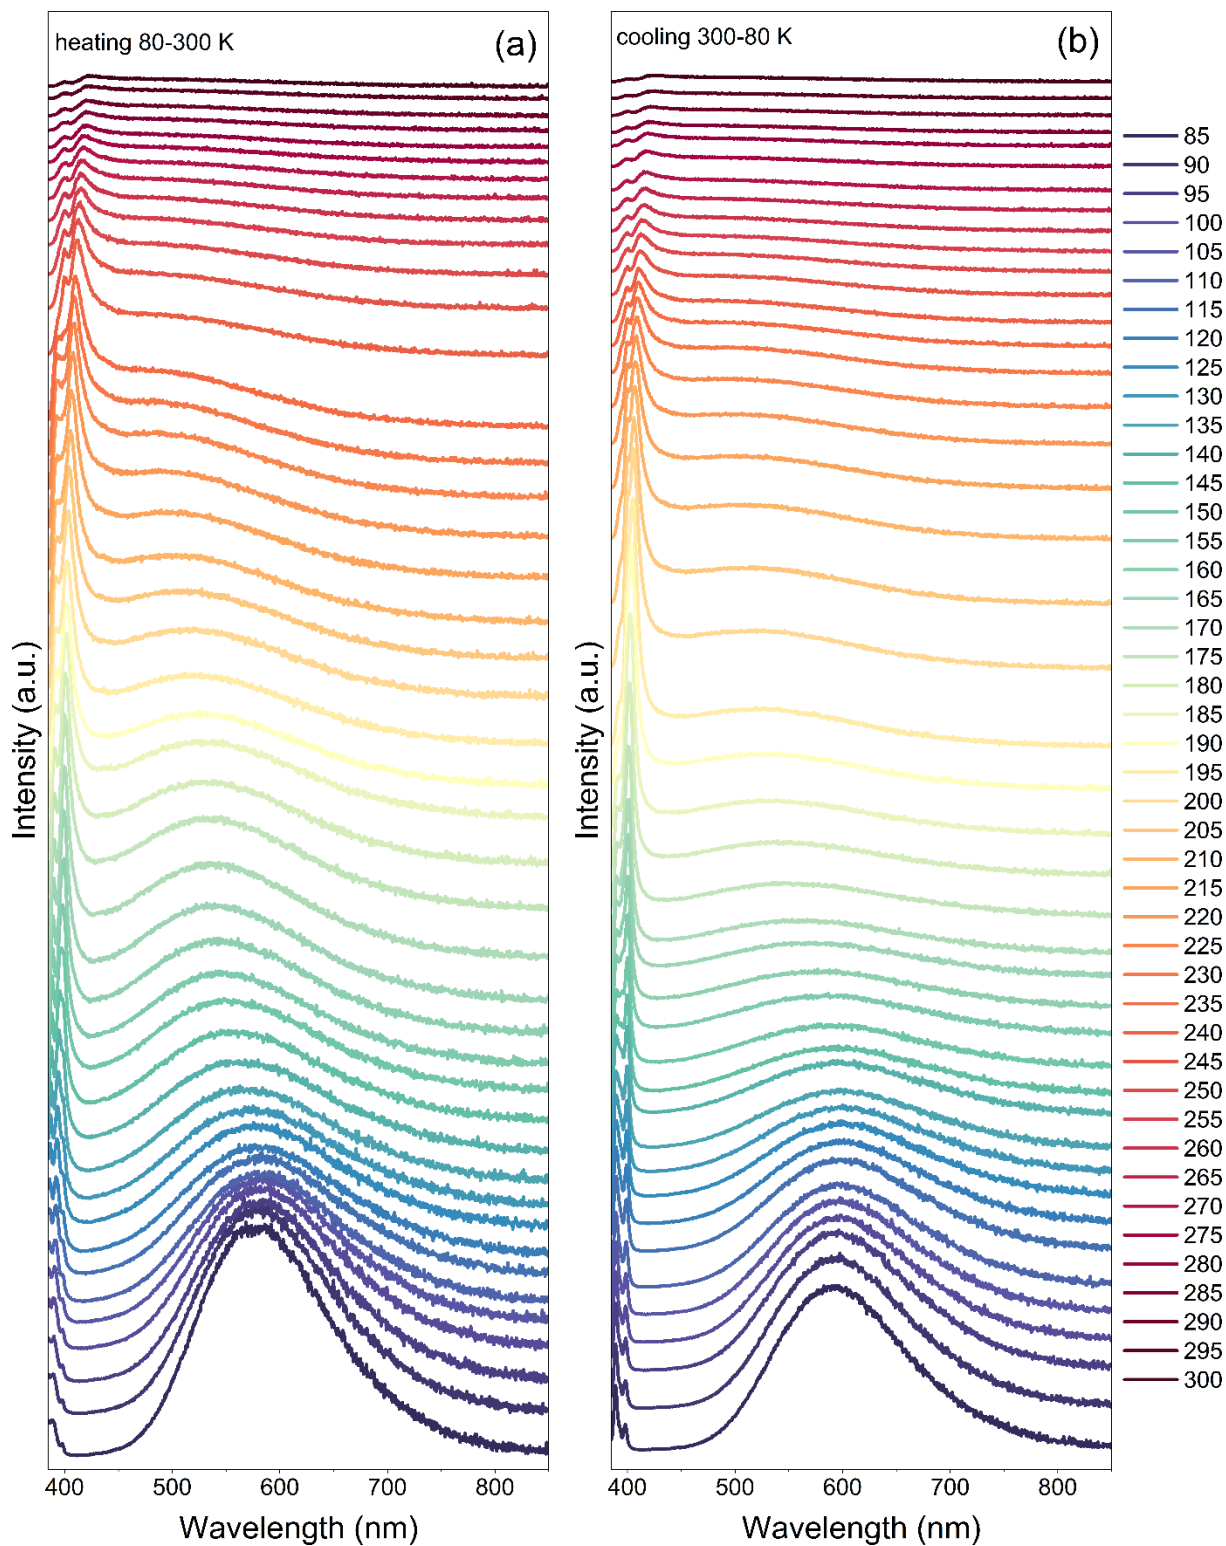

Figure S10. Emission spectra of CPA<sub>2</sub>PbBr<sub>4</sub> in the 385-850 nm range measured during (a) heating from 85 to 300K and (b) cooling from 300 to 85 K.

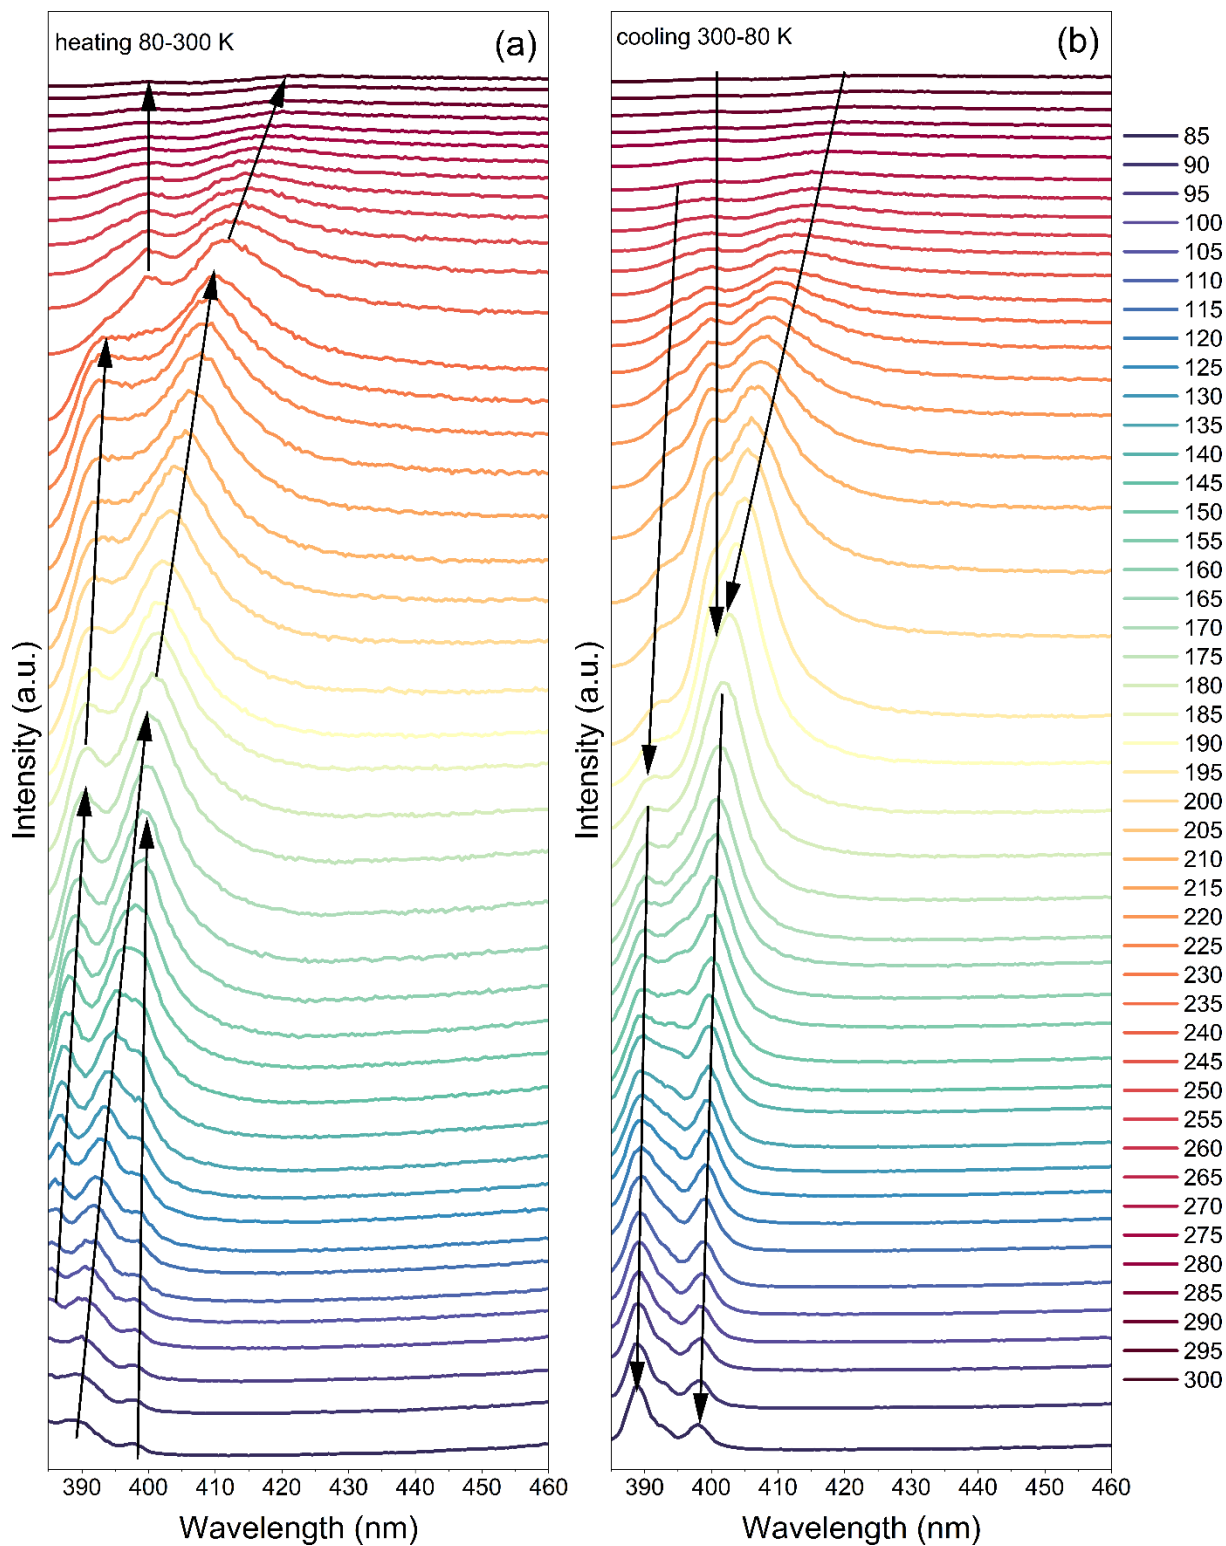

Figure S11. Emission spectra of CPA<sub>2</sub>PbBr<sub>4</sub> in the 385-460 nm range measured during (a) heating from 85 to 300K and (b) cooling from 300 to 85 K.

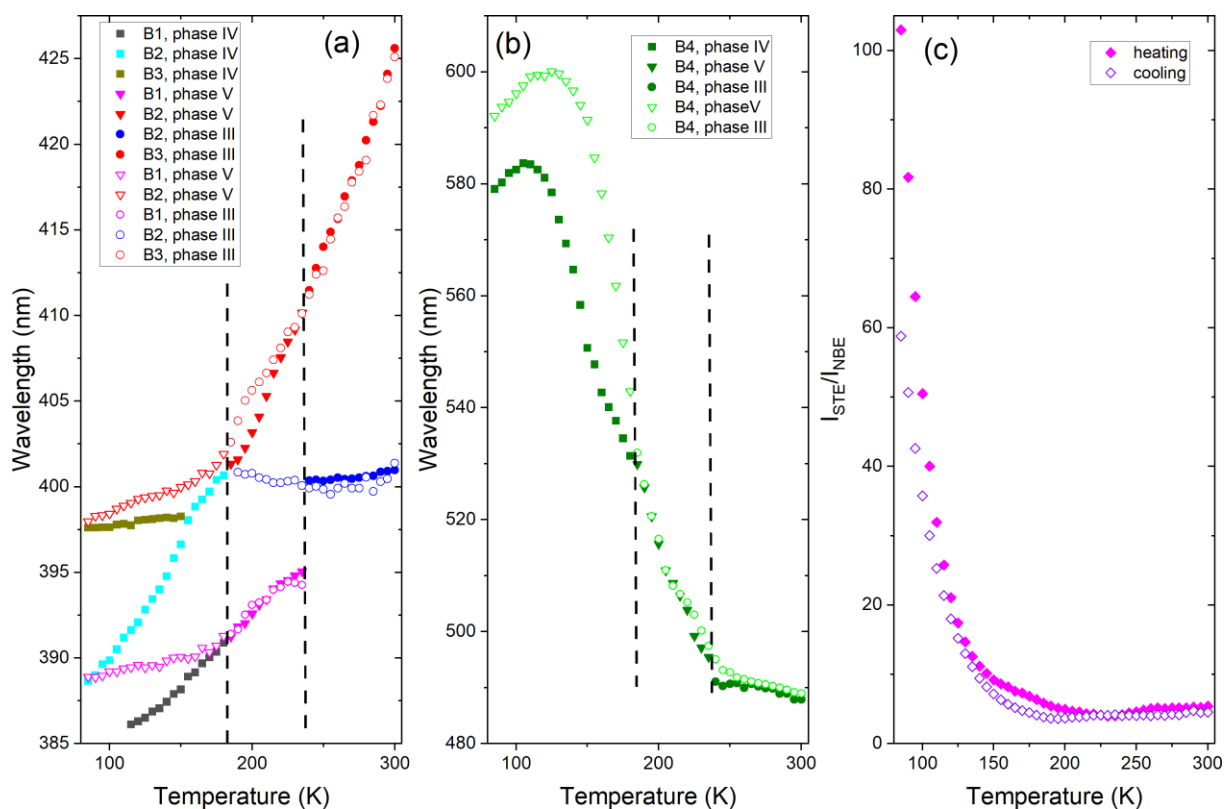

Figure S12. Changes of maximum peaks' position with temperature for the (a) NBE and (b) STE bands and the sample heated from 85 to 300 K (closed symbols) and cooled from 300 to 85 K (open symbols). Vertical lines indicate the phase transition temperatures during heating; squares, down triangles and circles correspond to phase IV, V and III, respectively. (c) temperature dependence of intensity ratio between STE and NBE bands.

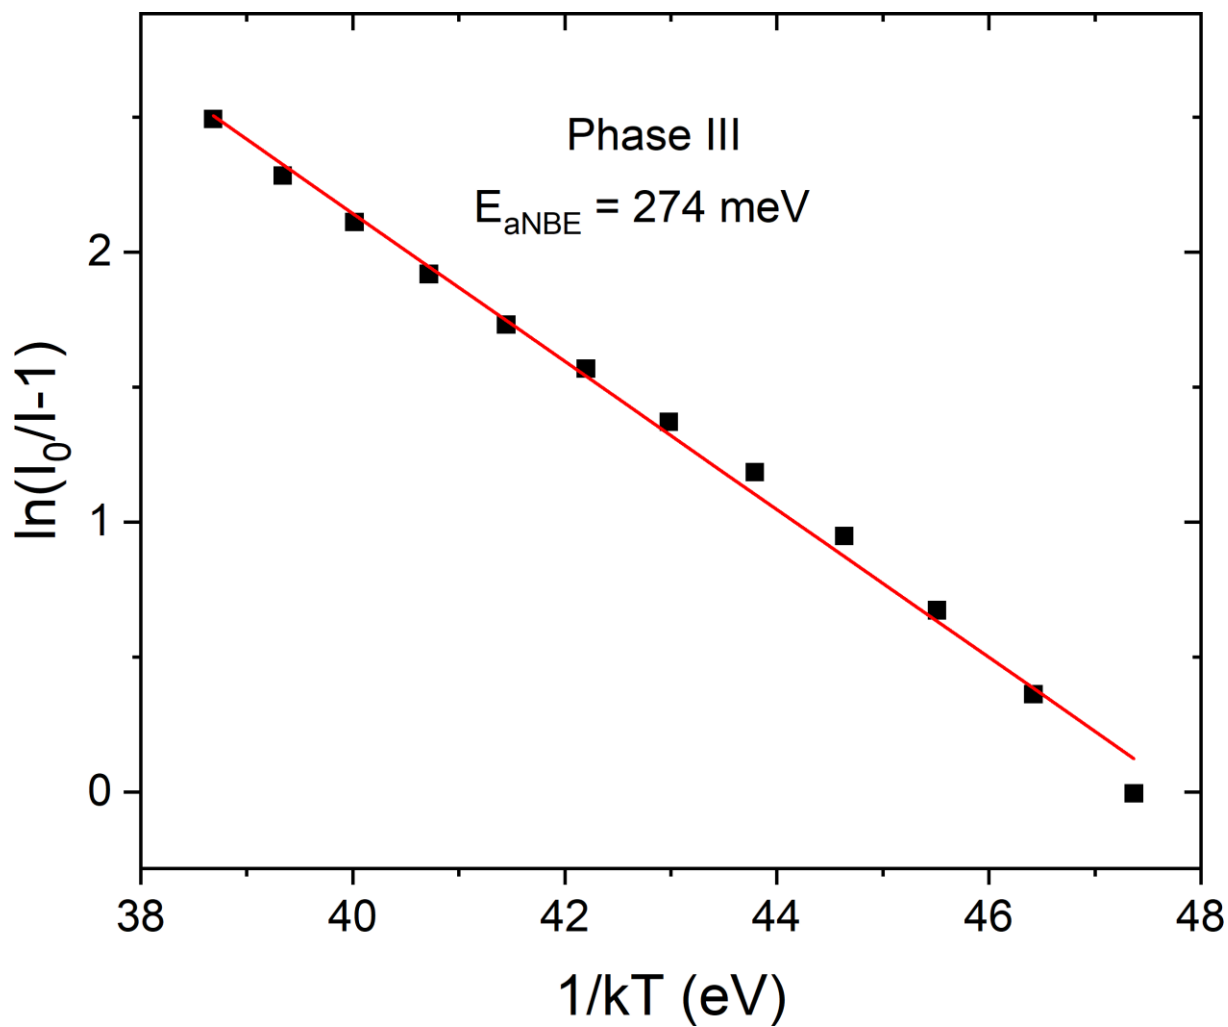

Figure S13. Logarithm of  $I_0/I-1$  as a function of  $1/kT$  of NBE PL of  $\text{CPA}_2\text{PbBr}_4$  during heating from 85 to 300 K.  $E_a$  was extracted by fitting the Arrhenius equation.

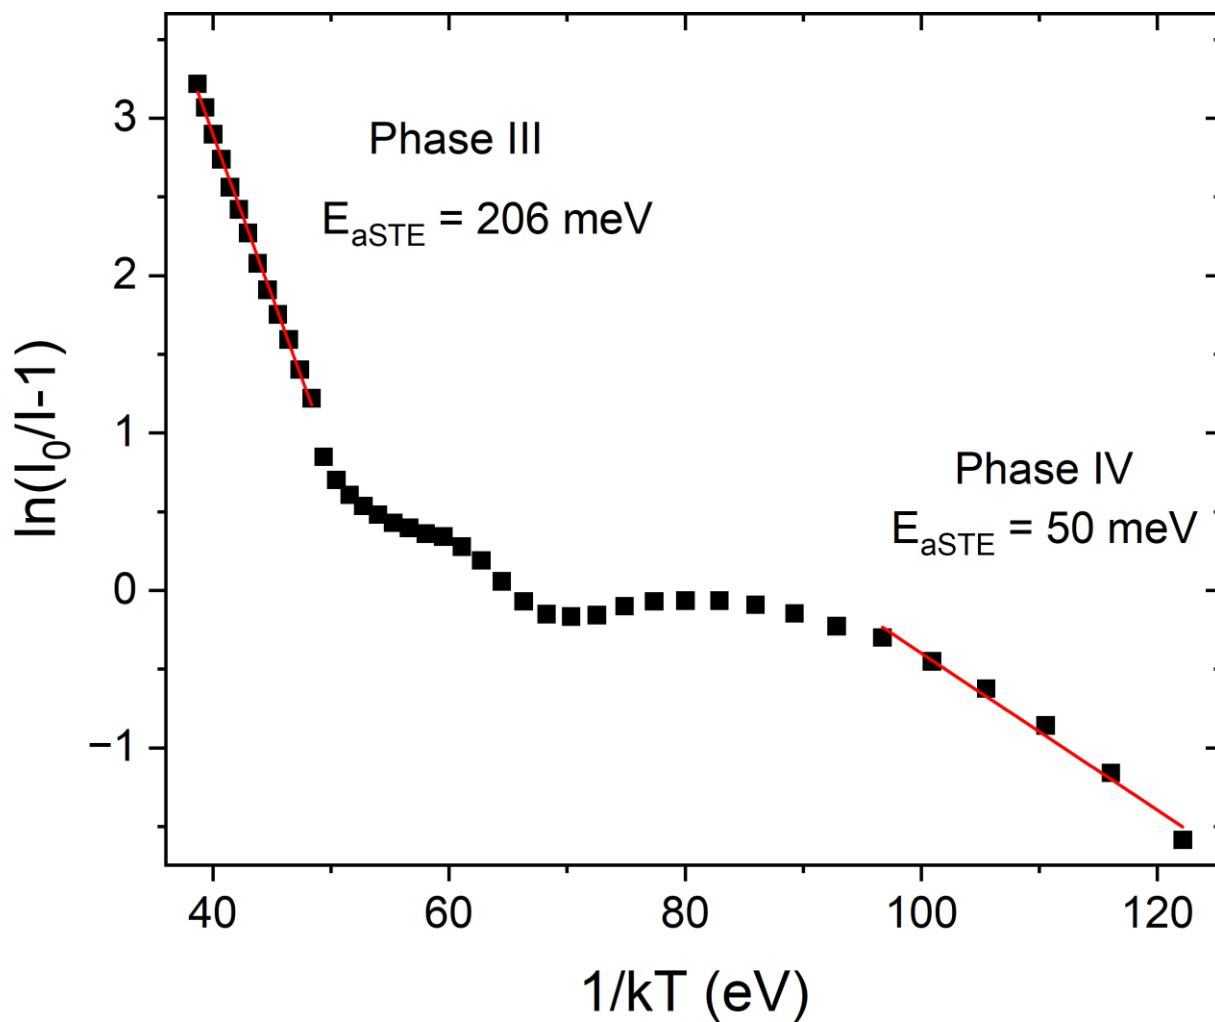

Figure S14. Logarithm of  $I_0/I-1$  as a function of  $1/kT$  of STE PL of  $\text{CPA}_2\text{PbBr}_4$  during heating from 85 to 300 K.  $E_a$  was extracted by fitting the Arrhenius equation.

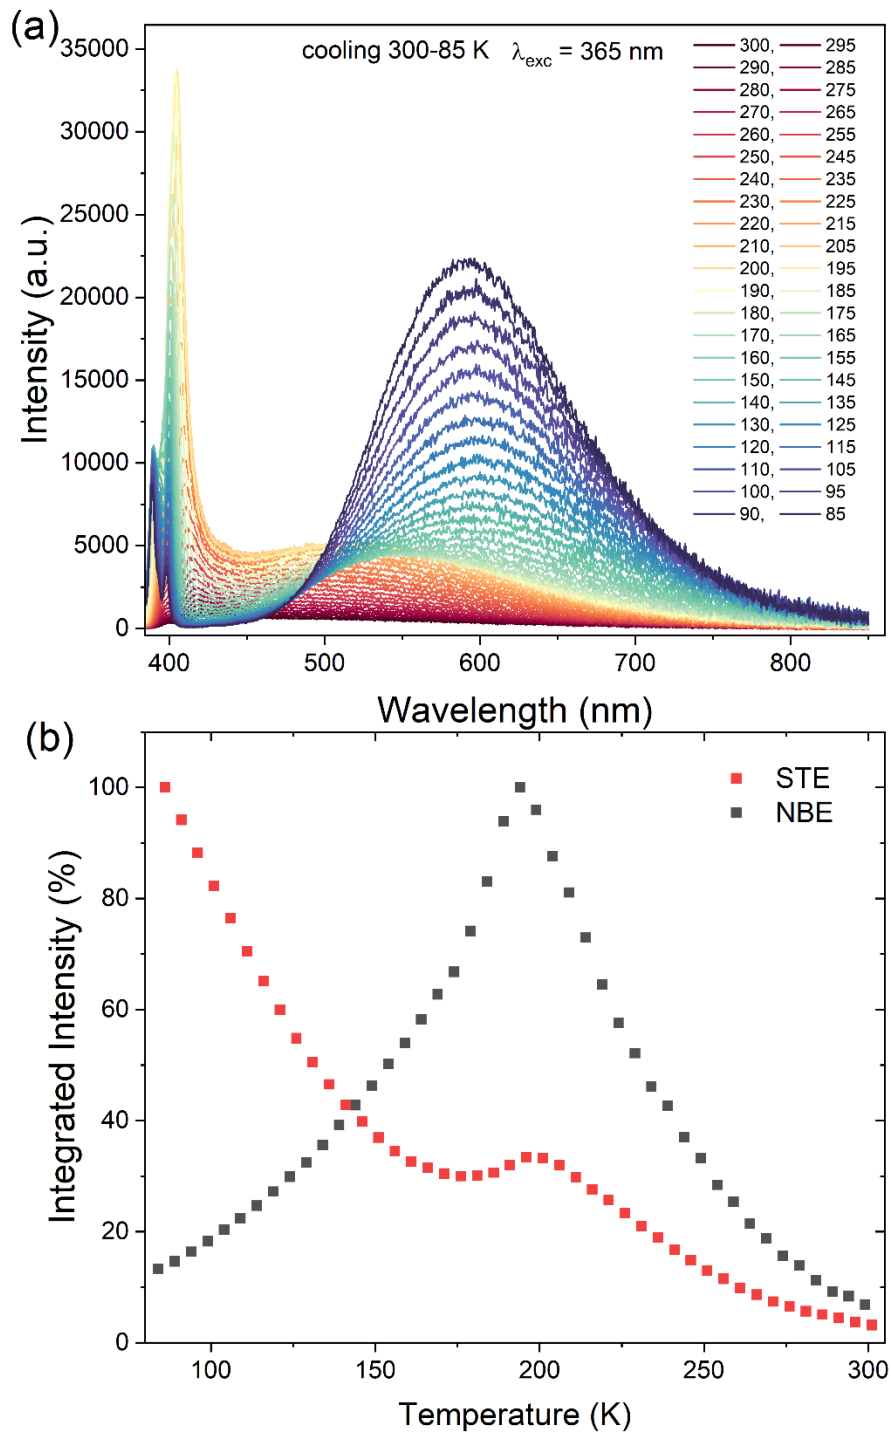

Figure S15. (a) PL spectra of CPA<sub>2</sub>PbBr<sub>4</sub> during cooling from 300 to 85 K. (b) Temperature dependence of integrated intensity of STE and NBE emission bands of CPA<sub>2</sub>PbBr<sub>4</sub> during cooling.

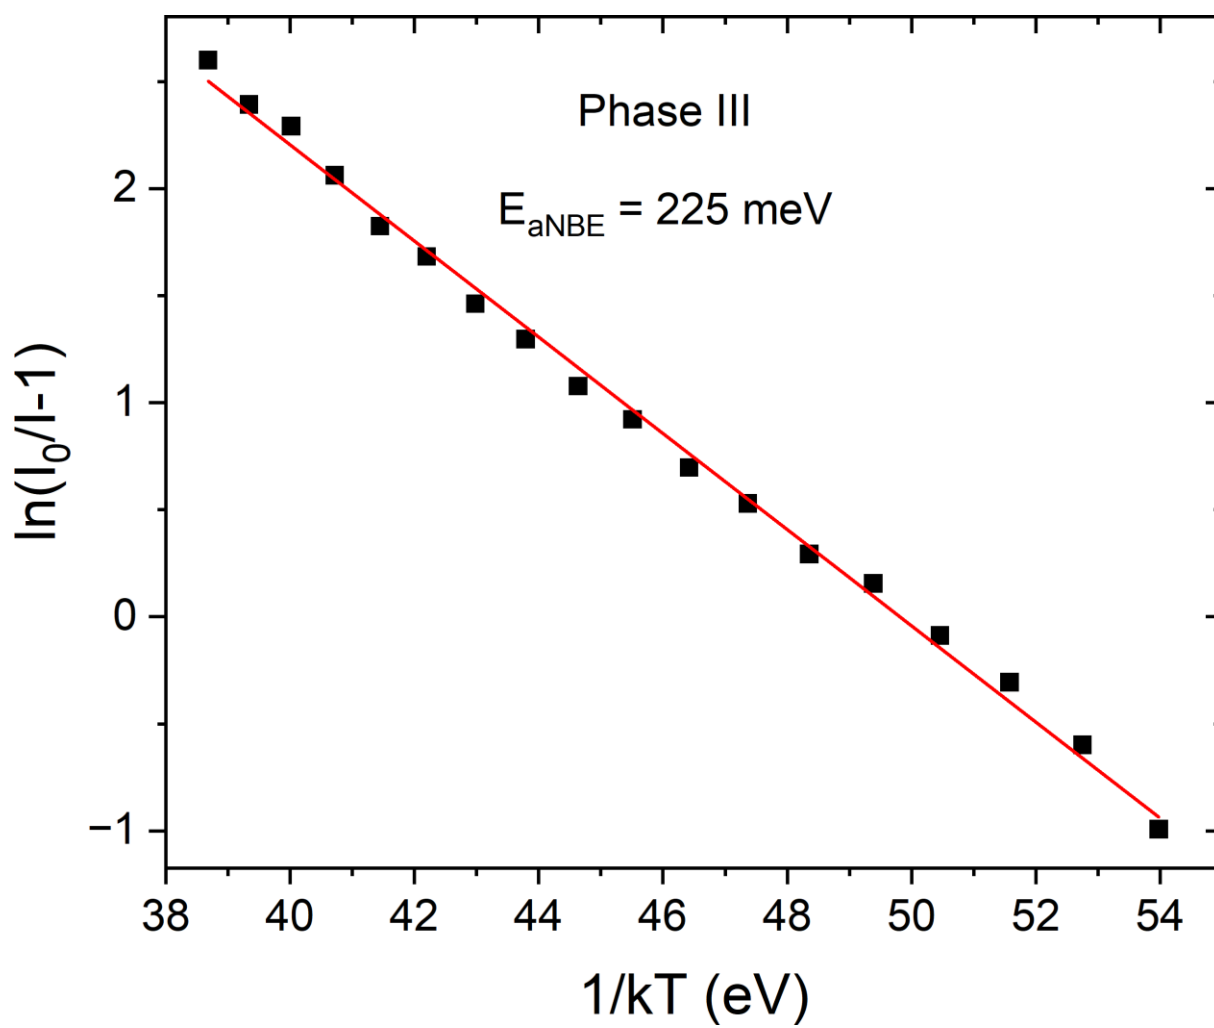

Figure S16. Logarithm of  $I_0/I-1$  as a function of  $1/kT$  of NBE emission of  $\text{CPA}_2\text{PbBr}_4$  during cooling from 300 to 85 K.  $E_a$  was extracted by fitting the Arrhenius equation.

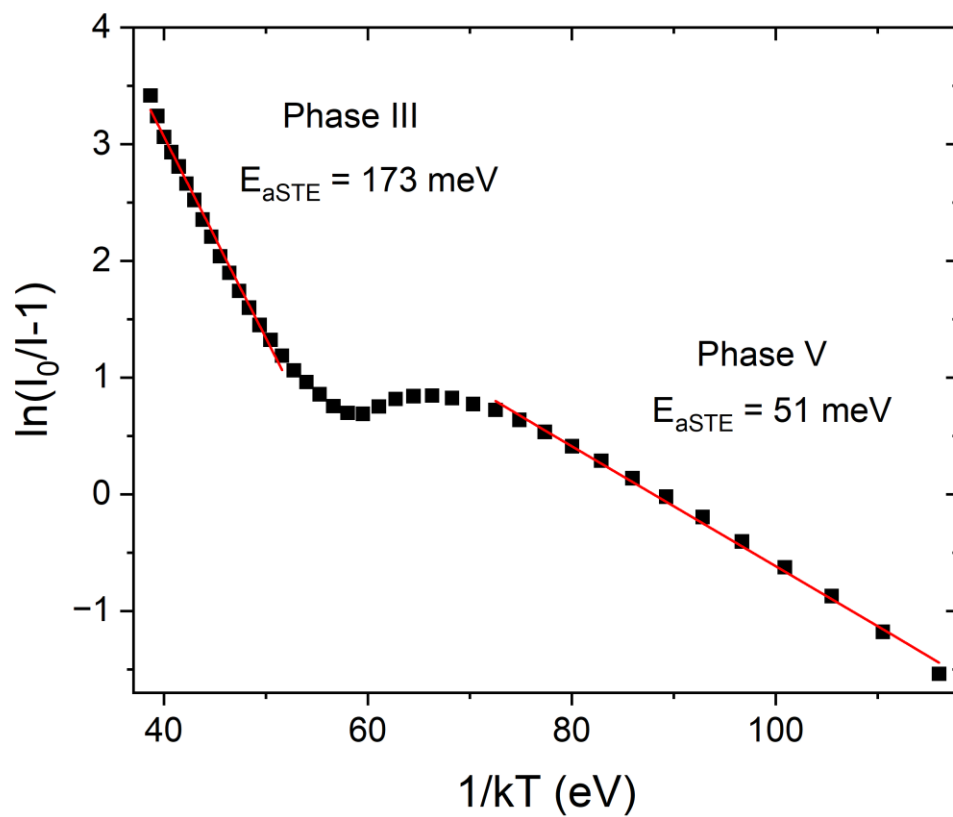

Figure S17. Logarithm of  $I_0/I-1$  as a function of  $1/kT$  of STE emission of annealed  $\text{CPA}_2\text{PbBr}_4$  during cooling from 300 to 85 K.  $E_a$  was extracted by fitting the Arrhenius equation.

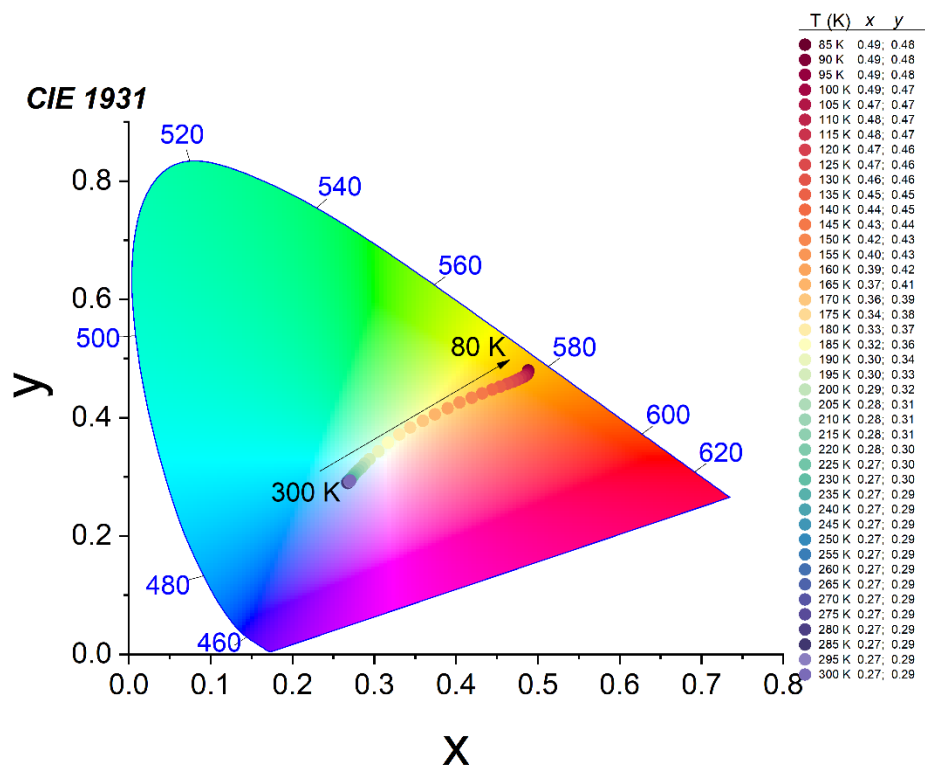

Figure S18. CIE coordinates of CPA<sub>2</sub>PbBr<sub>4</sub> during cooling from 300 to 85 K.

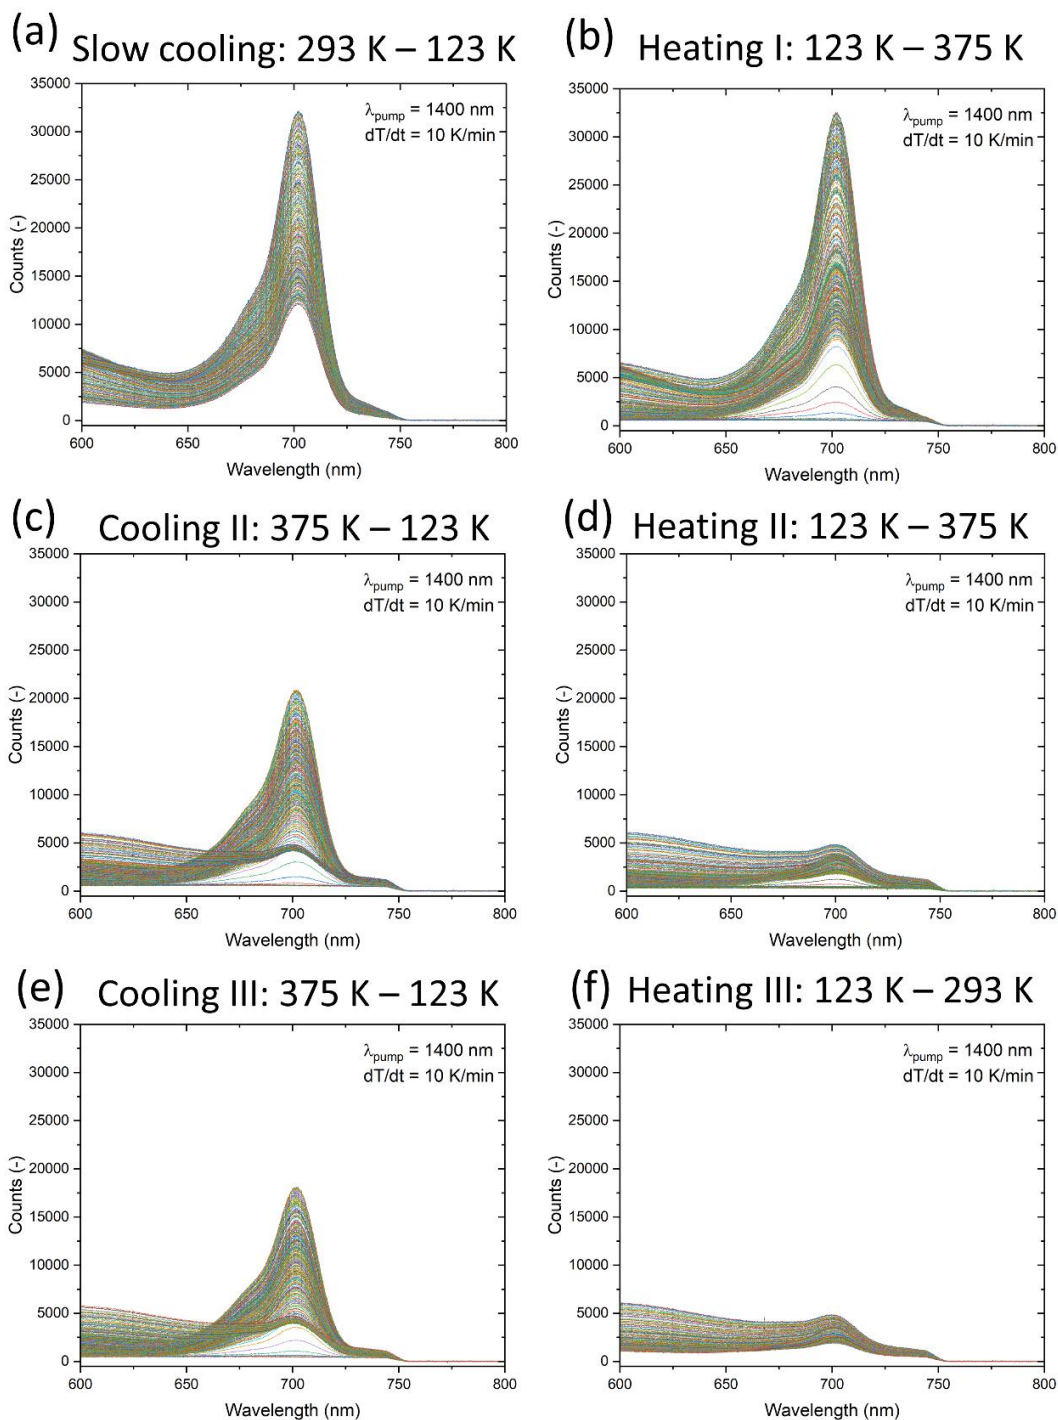

Figure S19. Temperature-resolved SHG spectra obtained for powdered  $\text{CPA}_2\text{PbBr}_4$  sample during consecutive heating/cooling cycles: (a) slow cooling 293K – 123K, (b) heating I 123K – 375K, (c) cooling II 375K – 123K, (d) heating II 123K – 375K, (e) cooling III 375K – 123K, (f) heating III 123K – 293K.

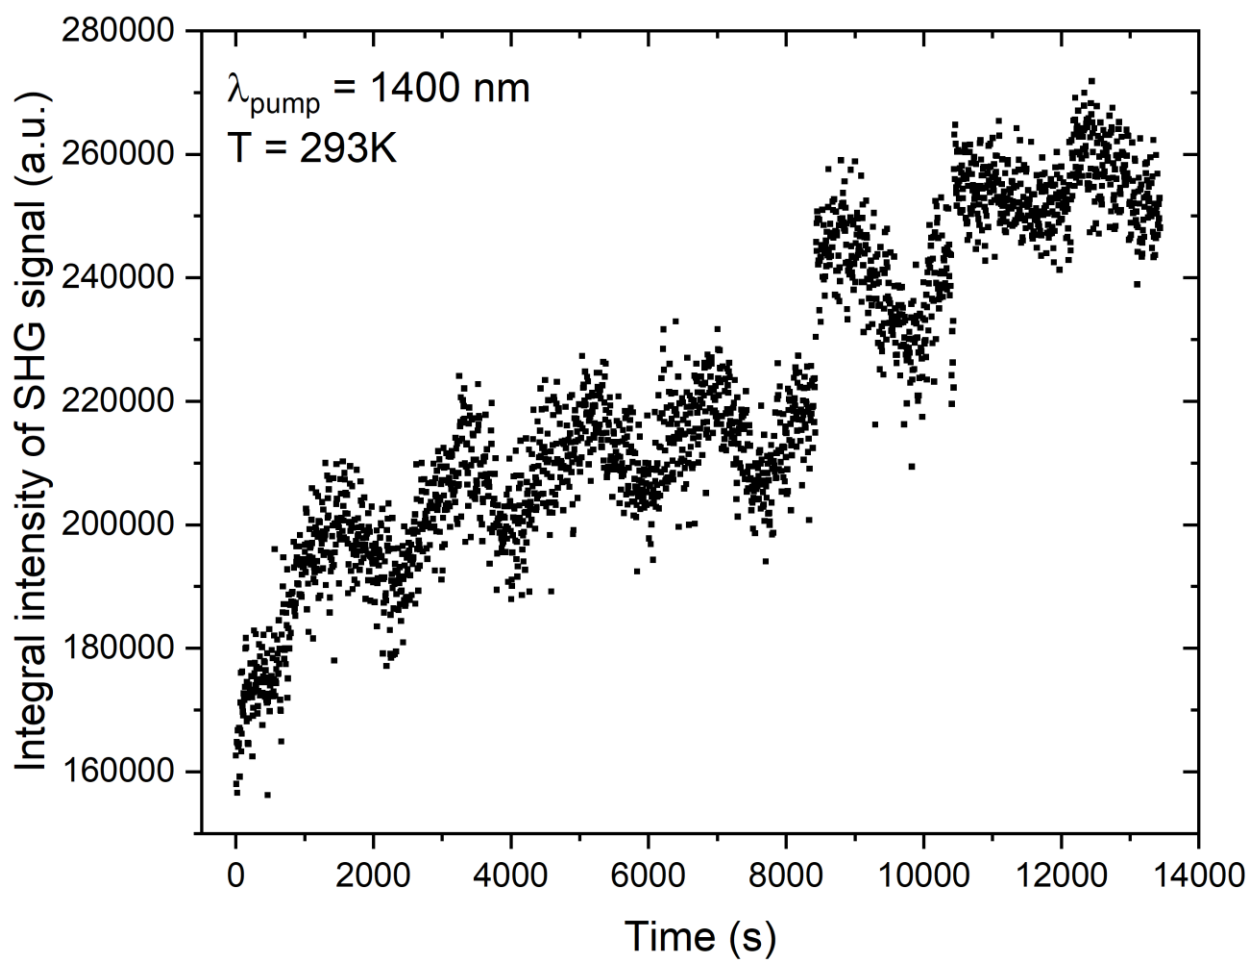

Figure S20. Plot of the integrated intensity of the SHG signal ( $\lambda_{\text{SHG}} = 700 \text{ nm}$ ) for a powdered  $\text{CPA}_2\text{PbBr}_4$  sample that had previously been subjected to three heating–cooling cycles. Over the course of almost 4 hours, the SHG intensity increased by 68%. The sinusoidal component present in the SHG trace is due to intrinsic oscillations of the femtosecond laser used for the measurements.

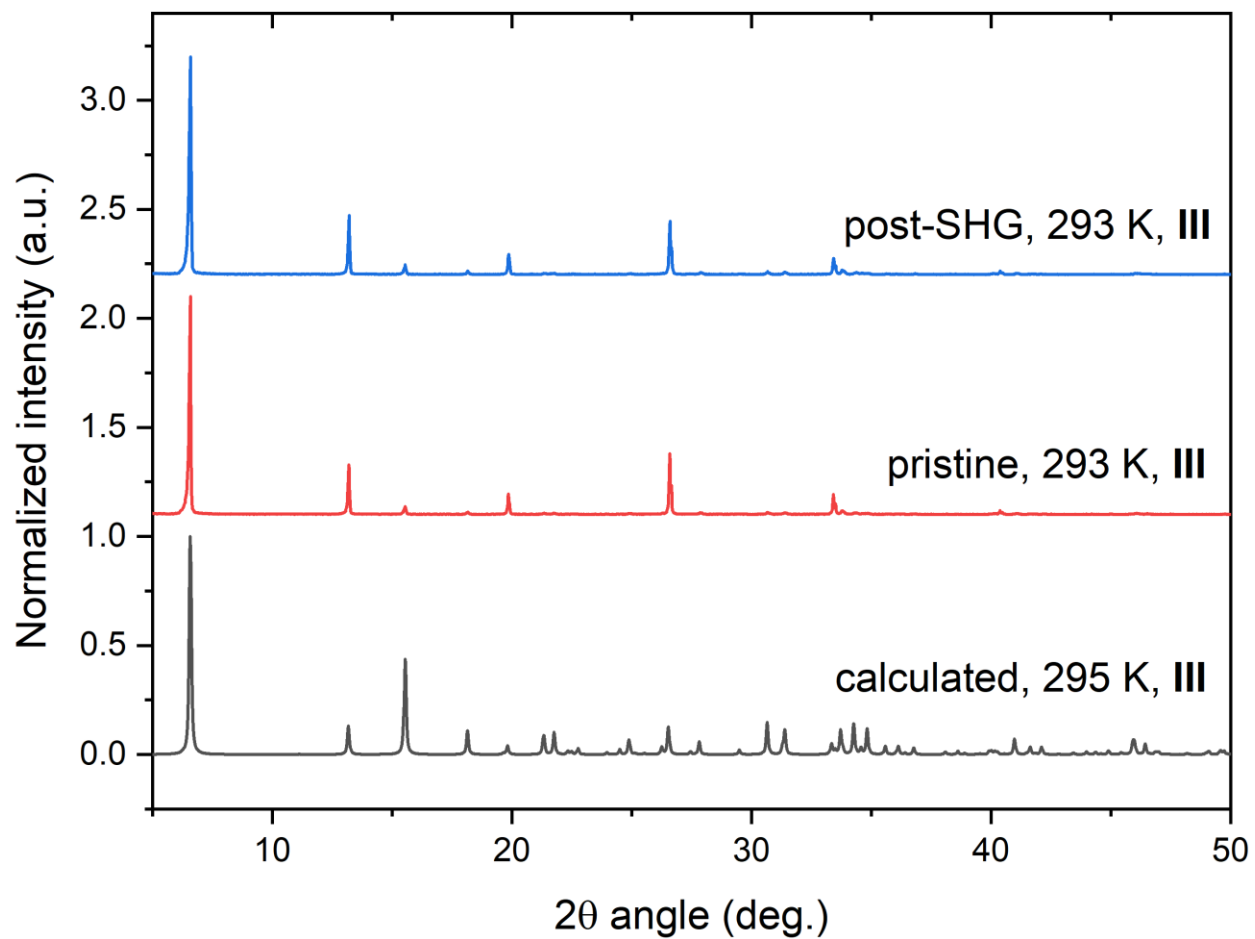

Figure S21. Theoretical PXRD pattern generated from the single-crystal structure (phase **III** of CPA<sub>2</sub>PbBr<sub>4</sub>), experimental PXRD pattern for pristine, powdered CPA<sub>2</sub>PbBr<sub>4</sub> and experimental PXRD pattern for a powdered CPA<sub>2</sub>PbBr<sub>4</sub> sample subjected to three heating–cooling cycles.

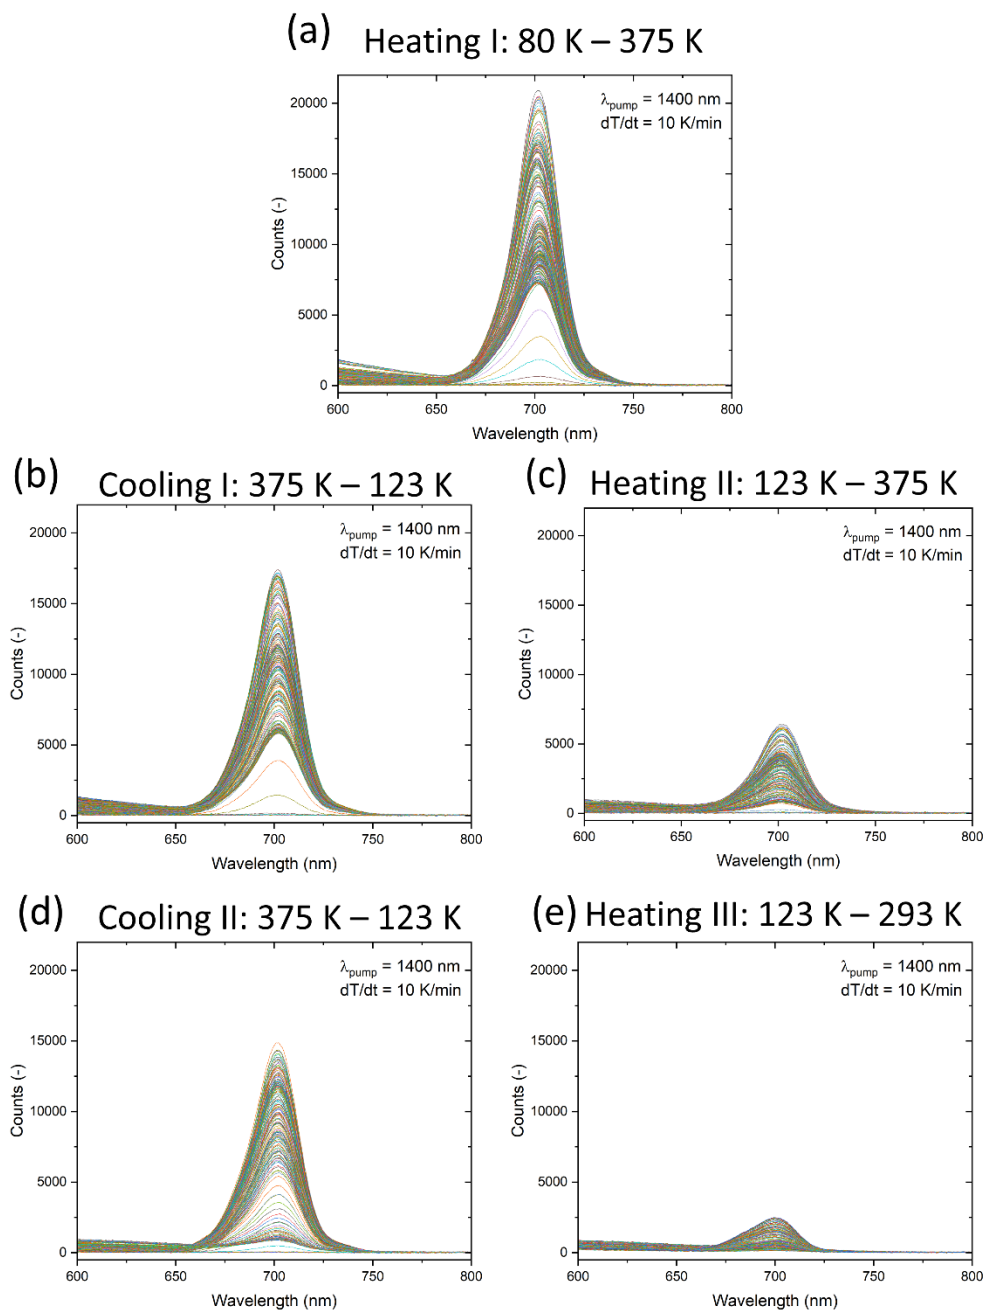

Figure S22. Temperature-resolved SHG spectra obtained for single crystal CPA<sub>2</sub>PbBr<sub>4</sub> sample subjected to initial rapid cooling during consecutive heating/cooling cycles: (a) heating I 80K – 375K, (b) cooling I 375K – 123K, (c) heating II 123K – 375K, (d) cooling II 375K – 123K, (e) heating III 123K – 293K.

## References

- (1) M. D. Smith, A. Jaffe, E. R. Dohner, A. M. Lindenberg, H. I. Karunadasa, *Chem. Sci.*, 2017, **8**, 4497-4504.
- (2) M. H. Jung, *Inorg. Chem.*, 2019, **58**, 6748-6757.
- (3) M. Mączka, J. K. Zaręba, A. Gaḡor, K. Fedoruk-Piskorska, D. Stefańska, D. Drozdowski, M. Ptak, A. Sieradzki, *ACS Appl. Mater. Interfaces.*, 2024, **16**, 60564–60575.
- (4) M. D. Smith, B. A. Connor, H. I. Karunadasa, *Chem. Rev.*, 2019, **119**, 3104–3139.
